# Supplementary material
Source: PubMed Central journal article supplement (PMC2823548)

## **Legends to supplementary figures**

### **Supplementary figure 1**

Comparison of  $^1\text{H}$ - $^{15}\text{N}$  HSQC spectra of the  $^{15}\text{N}$ -labeled AP-1 $\gamma$ -ear domain in the absence (blue) or presence (red) of Gadkin ( $\Delta 51$ ) (1:1 ratio) including assignments. Changes in chemical shifts indicate changes in conformation induced by complex formation. Residues are numbered.

### **Supplementary figure 2**

Overview of the chemical shifts for the  $^{15}\text{N}$ -labeled AP-1 $\gamma$ -ear domain in the absence or presence of Gadkin ( $\Delta 51$ ).

### **Supplementary figure 3**

c(S)-distributions for mixtures of Gadkin ( $\Delta 51$ ) and AP-1 $\gamma$ -ear. The distributions are normalized to have a total area of unity. The formation of a new species is indicated by the progressive shift to larger s-values of the new peak and the disappearance of the peak for free Gadkin ( $\Delta 51$ ).



## Supplementary Figure 2

### Chemical shifts for the AP-1 $\gamma$ -ear domain with and without Gadkin

|        | $\gamma$ -ear           |                 | $\gamma$ -ear (with Gadkin 1:1) |                 |
|--------|-------------------------|-----------------|---------------------------------|-----------------|
|        | $^1\text{H}^{\text{N}}$ | $^{15}\text{N}$ | $^1\text{H}^{\text{N}}$         | $^{15}\text{N}$ |
| 706Ser | 8.02                    | 114.2           | 8.02                            | 114.2           |
| 707Ile | 8.44                    | 111.0           | 8.45                            | 111.1           |
| 708Thr | 8.91                    | 119.9           | 8.92                            | 119.9           |
| 709Ala | 8.49                    | 131.7           | 8.50                            | 131.7           |
| 710Tyr | 7.46                    | 116.7           | 7.48                            | 116.8           |
| 711Ser | 8.35                    | 122.9           | 8.36                            | 122.9           |
| 712Lys | 8.41                    | 128.5           | 8.42                            | 128.6           |
| 714Gly | 8.45                    | 105.5           | 8.45                            | 105.5           |
| 715Leu | 7.97                    | 124.2           | 7.97                            | 124.1           |
| 716Lys | 8.89                    | 128.7           | 8.89                            | 128.7           |
| 717Ile | 9.28                    | 123.4           | 9.30                            | 123.4           |
| 718Glu | 8.98                    | 129.1           | 8.98                            | 129.1           |
| 719Phe | 9.34                    | 122.1           | 9.36                            | 122.2           |
| 720Thr | 8.23                    | 113.1           | 8.19                            | 113.1           |
| 721Phe | 9.11                    | 118.3           |                                 |                 |
| 722Glu | 9.07                    | 121.2           | 9.08                            | 121.2           |
| 723Arg | 8.86                    | 124.7           | 8.86                            | 124.7           |
| 724Ser | 8.94                    | 118.6           | 8.89                            | 118.5           |
| 729Ser | 8.11                    | 113.0           | 8.10                            | 113.0           |
| 730Val | 7.75                    | 122.9           | 7.78                            | 122.9           |
| 731Thr | 9.15                    | 125.7           | 9.14                            | 125.8           |
| 732Val | 9.20                    | 129.1           | 9.18                            | 128.9           |
| 733Ile | 9.69                    | 132.1           | 9.73                            | 132.2           |
| 734Thr | 8.69                    | 123.8           | 8.69                            | 123.8           |
| 735Ile | 9.23                    | 126.5           | 9.24                            | 126.5           |
| 737Ala | 9.36                    | 131.0           | 9.38                            | 131.0           |
| 738Ser | 9.23                    | 115.1           | 9.24                            | 115.1           |
| 739Asn | 9.33                    | 121.4           | 9.33                            | 121.4           |
| 740Ser | 9.03                    | 117.8           | 9.03                            | 117.8           |
| 742Glu | 9.11                    | 114.2           | 9.10                            | 114.2           |
| 743Leu | 7.80                    | 120.6           | 7.80                            | 120.6           |
| 744Asp | 8.96                    | 123.3           | 8.96                            | 123.3           |
| 745Met | 7.88                    | 122.0           | 7.87                            | 122.0           |
| 746Thr | 9.24                    | 113.4           | 9.24                            | 113.3           |
| 747Asp | 8.95                    | 118.8           | 8.94                            | 118.9           |
| 748Phe | 9.10                    | 118.3           |                                 |                 |
| 749Val | 8.96                    | 131.8           | 8.95                            | 131.8           |
| 750Phe | 8.63                    | 129.2           | 8.61                            | 129.3           |
| 751Gln | 7.99                    | 125.3           | 8.00                            | 124.3           |
| 752Ala | 7.86                    | 120.5           |                                 |                 |
| 753Ala | 8.83                    | 121.9           |                                 |                 |
| 754Val | 8.53                    | 114.5           | 8.51                            | 113.3           |
| 756Lys | 8.45                    | 118.4           | 8.40                            | 117.7           |
| 758Phe | 8.20                    | 121.3           | 8.23                            | 121.2           |
| 759Gln | 8.32                    | 116.5           | 8.37                            | 116.3           |
| 760Leu | 8.85                    | 124.0           | 8.80                            | 123.8           |
| 761Gln | 9.04                    | 124.5           |                                 |                 |
| 762Leu | 9.01                    | 127.8           | 9.05                            | 128.2           |
| 763Leu | 8.74                    | 127.9           |                                 |                 |

|        |      |       |      |       |
|--------|------|-------|------|-------|
| 764Ser | 8.22 | 114.1 | 8.28 | 114.0 |
| 766Ser | 9.13 | 115.2 | 9.14 | 115.0 |
| 767Ser | 7.45 | 112.7 | 7.43 | 112.4 |
| 769Val | 7.96 | 121.7 | 7.97 | 121.7 |
| 770Val | 9.21 | 128.0 | 9.21 | 128.0 |
| 772Ala | 8.40 | 120.7 | 8.40 | 120.7 |
| 773Phe | 8.69 | 113.5 | 8.68 | 113.5 |
| 774Asn | 9.50 | 113.5 | 9.50 | 113.5 |
| 775Thr | 7.36 | 107.0 | 7.36 | 107.0 |
| 776Gly | 7.23 | 107.4 | 7.23 | 107.4 |
| 777Thr | 8.40 | 111.2 | 8.40 | 111.2 |
| 778Ile | 8.22 | 118.9 | 8.22 | 118.9 |
| 779Thr | 8.71 | 118.4 | 8.71 | 118.4 |
| 780Gln | 8.00 | 124.1 | 8.00 | 124.1 |
| 781Val | 8.51 | 128.8 | 8.50 | 128.9 |
| 782Ile | 9.39 | 124.3 | 9.38 | 124.6 |
| 783Lys | 9.28 | 124.4 | 9.35 | 124.6 |
| 784Val | 9.10 | 123.9 | 9.09 | 123.9 |
| 785Leu | 9.19 | 129.7 | 9.16 | 129.6 |
| 788Gln | 8.74 | 114.2 | 8.70 | 114.0 |
| 789Lys | 7.64 | 119.1 | 7.61 | 118.9 |
| 790Gln | 8.14 | 116.7 | 8.13 | 116.8 |
| 791Gln | 7.86 | 119.6 | 7.84 | 119.6 |
| 793Arg | 6.26 | 119.4 | 6.18 | 119.4 |
| 794Met | 8.45 | 117.5 | 8.56 | 117.8 |
| 795Arg | 8.83 | 126.1 |      |       |
| 796Ile | 9.36 | 119.4 | 9.42 | 117.4 |
| 797Lys | 8.33 | 124.0 | 8.23 | 123.6 |
| 798Leu | 8.69 | 126.3 | 8.63 | 126.5 |
| 799Thr | 8.06 | 113.2 | 8.01 | 113.4 |
| 800Tyr | 8.04 | 114.9 | 8.02 | 115.0 |
| 801Asn | 9.58 | 118.1 | 9.56 | 118.1 |
| 802His | 9.16 | 123.2 | 9.16 | 123.2 |
| 803Lys | 9.40 | 126.6 | 9.39 | 126.6 |
| 804Gly | 8.70 | 105.8 | 8.70 | 105.8 |
| 805Ser | 7.84 | 116.3 | 7.82 | 116.2 |
| 806Ala | 8.39 | 127.4 | 8.38 | 127.4 |
| 807Met | 9.07 | 123.7 | 9.02 | 123.2 |
| 808Gln | 8.23 | 119.5 | 8.19 | 119.9 |
| 809Asp | 8.94 | 121.7 | 8.92 | 122.2 |
| 811Ala | 8.93 | 124.7 | 8.95 | 124.2 |
| 812Glu | 8.77 | 121.1 | 8.79 | 121.1 |
| 813Val | 9.04 | 125.3 |      |       |
| 814Asn | 8.74 | 123.8 |      |       |
| 815Asn | 8.65 | 118.6 | 8.66 | 118.3 |
| 816Phe | 8.10 | 118.2 | 8.10 | 118.1 |
| 819Gln | 9.02 | 114.4 | 9.00 | 114.4 |
| 820Ser | 8.21 | 111.9 | 8.19 | 111.9 |
| 821Trp | 7.15 | 118.5 | 7.14 | 118.5 |
| 822Gln | 7.16 | 126.0 | 7.13 | 125.9 |

Suppl. Fig. 3

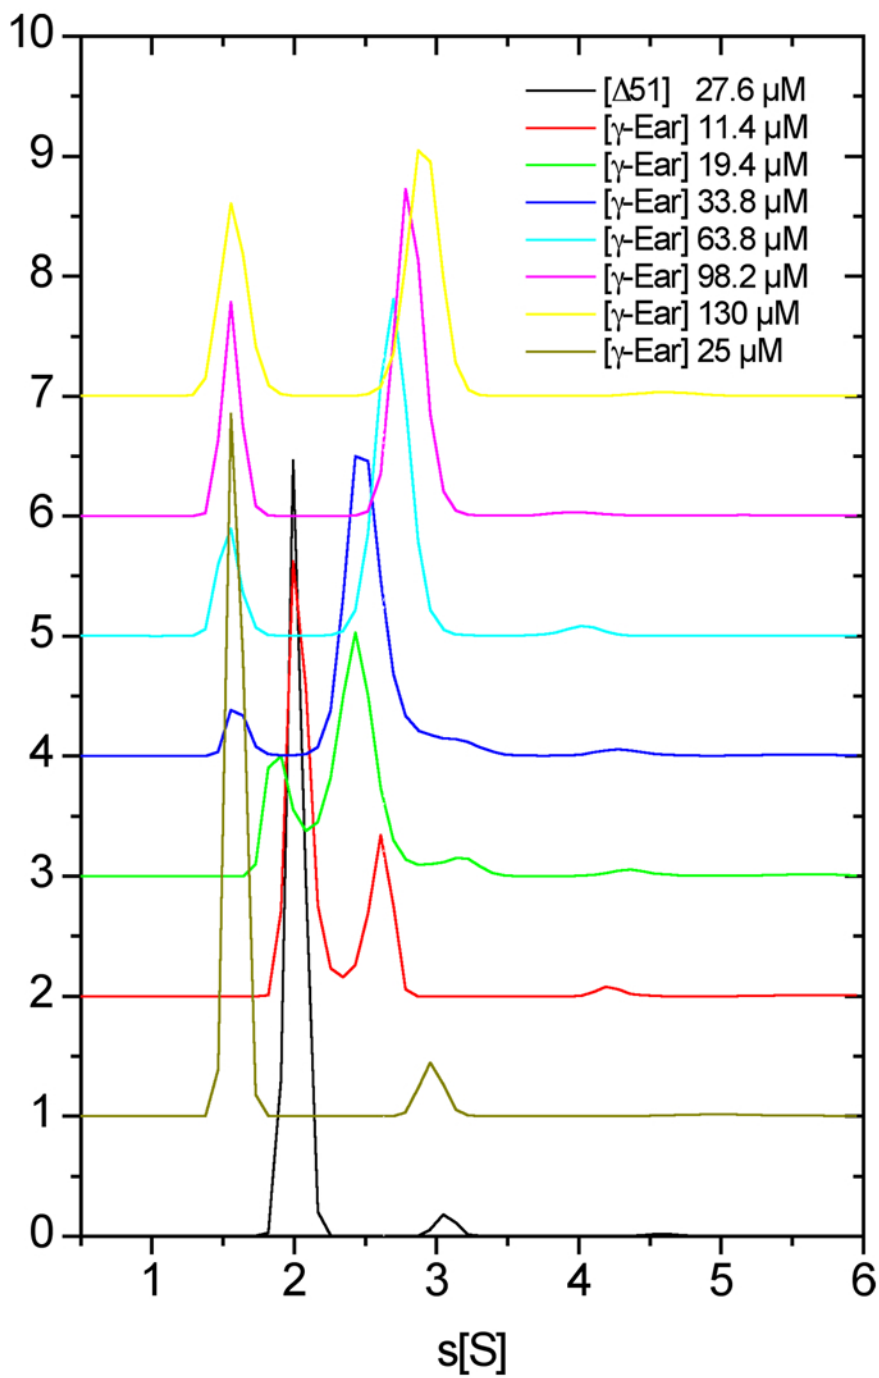

Supplement: supp_M109.049197_jbc.M109.049197-1.pdf [file supp_M109.049197_jbc.M109.049197-1.pdf]
